# Supplementary material for: Relationship between Apolipoprotein E Genotype and Lipoprotein Profile in Patients with Coronary Heart Disease
Source: MDPI journal article supplement (doi:10.3390/molecules27041377), 2022-02-18
Supplement: s1 [file s1]

## Supplementary Materials

Table S1: Comparison of lipoprotein particle concentrations of 360 patients grouped by APOE genotype. Parameters are described by mean  $\pm$  SD.

| 1. (nmol/L)            | 2. $\epsilon 2+$        | 3. $\epsilon 3$          | 4. $\epsilon 4+$         | 5. <i>P</i> |
|------------------------|-------------------------|--------------------------|--------------------------|-------------|
| 6. <b>VLPN*</b>        | 7. 212.58 $\pm$ 155.44  | 8. 167.79 $\pm$ 76.77    | 9. 176.2 $\pm$ 67.58     | 10. 0.008   |
| 11. <b>IDPN</b>        | 12. 71.17 $\pm$ 47.89   | 13. 65.77 $\pm$ 33.44    | 14. 67.21 $\pm$ 31.09    | 15. 0.624   |
| 16. <b>LDPN*</b>       | 17. 995.52 $\pm$ 379.51 | 18. 1141.02 $\pm$ 372.29 | 19. 1253.01 $\pm$ 479.85 | 20. 0.004   |
| 21. <b>Small LDL*</b>  | 22. 436.52 $\pm$ 246.36 | 23. 560.29 $\pm$ 223.37  | 24. 618.87 $\pm$ 251.13  | 25. <0.001  |
| 26. <b>Medium LDL*</b> | 27. 240.46 $\pm$ 123.81 | 28. 293.62 $\pm$ 143.3   | 29. 330.65 $\pm$ 179.95  | 30. 0.008   |
| 31. <b>Large LDL</b>   | 32. 316.2 $\pm$ 125.78  | 33. 280.64 $\pm$ 113.06  | 34. 292.17 $\pm$ 99.88   | 35. 0.131   |
| 36. <b>LDL size*</b>   | 37. 20.44 $\pm$ 0.32    | 38. 20.20 $\pm$ 0.29     | 39. 20.17 $\pm$ 0.25     | 40. <0.001  |

\**P*<0.05;

Table S2: Comparison of lipoprotein compositions concentrations of 360 patients grouped by APOE genotype. Parameters are described by median (IQR).

|             |                | ε2+                    | ε3                        | ε4+                   | P         |
|-------------|----------------|------------------------|---------------------------|-----------------------|-----------|
| apo A1      | Total apo A1   | 128.22(118.56-138.19)  | 122.22(110.9875-135.5075) | 119.43(107.83-133.88) | 0.100     |
|             | HDL            | 123.3(113.595-133.445) | 116.6(105.635-133.4025)   | 115.4(102.04-128.12)  | 0.054     |
|             | HDL-1          | 19.03(15.28-27.18)     | 18.045(14.3075-23.605)    | 16.3(13.97-20.85)     | 0.051     |
|             | HDL-2          | 12.33(9.95-15.015)     | 12.175(9.805-14.325)      | 11.18(9.08-13.51)     | 0.035 *   |
|             | HDL-3          | 20.99(18.74-23.81)     | 19.485(16.6325-23.0375)   | 18.58(15.64-21.86)    | 0.014 *   |
|             | HDL-4          | 61.65(57.625-67.84)    | 62.825(55.8125-70.6825)   | 64.58(59.07-71.33)    | 0.482     |
| apo A2      | Total apo A2   | 25.2(23.585-26.865)    | 24.38(21.84-27.6775)      | 23.81(22.02-26.89)    | 0.537     |
|             | HDL            | 26.04(24.51-27.825)    | 25.395(22.9-28.29)        | 24.74(23.01-27.91)    | 0.522     |
|             | HDL-1          | 0.97(0.56-1.895)       | 1.065(0.57-1.7)           | 0.83(0.57-1.26)       | 0.124     |
|             | HDL-2          | 1.87(1.215-2.62)       | 1.79(1.26-2.4125)         | 1.48(1.26-1.95)       | 0.042 *   |
|             | HDL-3          | 4.61(3.91-5.49)        | 4.235(3.6175-5.1025)      | 4.04(3.53-4.81)       | 0.057     |
|             | HDL-4          | 14.1(12.735-16)        | 15.23(13.0125-17.41)      | 15.62(14.13-16.95)    | 0.128     |
| apo B100    | Total apo B100 | 76.14(52.525-90.65)    | 77.085(62.9675-94.6675)   | 83.92(68.68-101.74)   | 0.058     |
|             | VLDL           | 9.98(7.535-12.645)     | 8.525(6.215-11.45)        | 8.88(6.84-11.86)      | 0.077     |
|             | IDL            | 3.54(2.18-5.105)       | 3.27(2.4275-4.5725)       | 3.56(2.48-4.71)       | 0.734     |
|             | LDL            | 52.56(37.44-68.875)    | 59.325(47.0825-77.7825)   | 63.17(54.47-80.15)    | 0.007 **  |
|             | LDL-1          | 10.42(7.55-13.68)      | 8.66(6.9225-10.99)        | 9.37(7.88-11.5)       | 0.022 *   |
|             | LDL-2          | 5.45(4.445-7.555)      | 5.61(3.9975-7.1575)       | 5.81(4.5-7.96)        | 0.621     |
|             | LDL-3          | 5.63(4.035-7.77)       | 6.92(5.34-9.04)           | 7.45(5.64-9.67)       | 0.019 *   |
|             | LDL-4          | 6.77(3.83-9.695)       | 8.38(5.8275-11.405)       | 9.1(6.38-11.82)       | 0.006 **  |
|             | LDL-5          | 8.05(4.735-11.9)       | 11.35(8.485-15.51)        | 12.69(9.51-16.78)     | <0.001 ** |
|             | LDL-6          | 13.49(9.245-19.9)      | 17.415(13.315-23.9275)    | 21.08(14.63-25.38)    | 0.001 **  |
| Cholesterol | Total CH       | 163.74(132.735-193.31) | 163.005(136.2-192.595)    | 173.67(149.49-195.66) | 0.338     |
|             | VLDL           | 72.63(50.395-101.465)  | 86.5(67.835-108.9625)     | 93.5(74.75-112.13)    | 0.006 **  |
|             | IDL            | 46.07(39.485-49.3)     | 43.85(38.09-50.285)       | 42.65(37.36-48.01)    | 0.181     |
|             | LDL            | 21.17(15.15-32.41)     | 18.765(12.135-26.06)      | 20.43(13.53-26.99)    | 0.113     |
|             | HDL            | 9.68(5.49-15.02)       | 8.835(6.0625-12.7725)     | 9.93(6.54-13.79)      | 0.390     |
|             | VLDL-1         | 6.42(4.305-10.91)      | 5.53(3.1025-8.8125)       | 6.09(3.88-10.17)      | 0.102     |
|             | VLDL-2         | 2.89(1.87-5.545)       | 2.84(1.5325-4.3225)       | 3.42(2.16-5.22)       | 0.118     |
|             | VLDL-3         | 3.98(2.615-6.865)      | 3.62(2.105-5.715)         | 4.33(2.45-5.8)        | 0.208     |
|             | VLDL-4         | 5.06(3.095-7.05)       | 4.18(2.8625-5.7)          | 4.37(3.25-5.67)       | 0.230     |
|             | VLDL-5         | 1.77(1.425-2.28)       | 1.48(1.1225-1.92)         | 1.53(1.31-1.77)       | 0.011 *   |
|             | LDL-1          | 17.79(13.475-25.4)     | 15.12(12.0525-19.64)      | 16.59(14.05-20.75)    | 0.028 *   |
|             | LDL-2          | 8.04(6.22-12.22)       | 8.685(5.6325-12.06)       | 9.53(6.27-12.82)      | 0.750     |
|             | LDL-3          | 7.68(5.625-12.23)      | 10.24(7.525-14.5325)      | 11.4(7.94-15.69)      | 0.013 *   |
|             | LDL-4          | 9.18(4.855-14.82)      | 12.375(8.0825-17.575)     | 14.32(9.66-18.42)     | 0.007 **  |
|             | LDL-5          | 10.15(6.21-15.725)     | 15.765(10.975-22.085)     | 17.07(13.95-23.79)    | <0.001**  |
|             | LDL-6          | 15.19(11.46-23.36)     | 20.925(16.1775-27.9075)   | 25.54(17.93-29.81)    | <0.001**  |
|             | HDL-1          | 13.22(11.215-17.005)   | 13.45(10.7975-16.355)     | 12.7(10.68-15.55)     | 0.451     |

|                  |          |                        |                        |                     |           |
|------------------|----------|------------------------|------------------------|---------------------|-----------|
| Free Cholesterol | HDL-2    | 7.05(5.87-9.035)       | 6.645(5.53-8.4025)     | 6.13(5.04-7.31)     | 0.006 **  |
|                  | HDL-3    | 7.84(6.64-8.84)        | 7.25(6.0575-8.8425)    | 7.28(5.69-8.33)     | 0.126     |
|                  | HDL-4    | 14.85(13.02-16.365)    | 15.315(12.7325-17.935) | 15.72(13.19-17.45)  | 0.401     |
|                  | VLDL     | 10.13(7.4-13.465)      | 8.74(6.145-11.7025)    | 9.4(6.73-12.58)     | 0.094     |
|                  | IDL      | 3.06(1.73-4.35)        | 2.545(1.7-3.75)        | 2.99(1.94-3.97)     | 0.246     |
|                  | LDL      | 23.32(16.81-30.615)    | 26.36(21.48-32.8875)   | 28.76(23.56-33.38)  | 0.009 **  |
|                  | HDL      | 10.41(9.03-12.26)      | 10.34(9.0375-11.8975)  | 9.61(8.09-11.76)    | 0.327     |
|                  | VLDL-1   | 2.34(1.425-3.75)       | 1.83(0.8975-3.4425)    | 2.41(1.24-3.78)     | 0.089     |
|                  | VLDL-2   | 1.65(1.205-2.715)      | 1.385(0.7775-2.305)    | 1.53(1.01-2.91)     | 0.091     |
|                  | VLDL-3   | 2.05(1.395-3.18)       | 1.66(0.9975-2.6825)    | 1.96(1.11-2.97)     | 0.128     |
|                  | VLDL-4   | 2.67(1.69-3.5)         | 1.935(1.2475-2.8)      | 2.05(1.31-2.63)     | 0.035 *   |
|                  | VLDL-5   | 0.43(0.175-0.74)       | 0.27(0.0775-0.5225)    | 0.24(0.08-0.41)     | 0.008 **  |
|                  | LDL-1    | 5.59(3.965-7.695)      | 4.715(3.6175-6.13)     | 4.95(4.18-6.35)     | 0.059     |
|                  | LDL-2    | 3.11(2.2-4.045)        | 3.11(2.21-4.1225)      | 3.31(2.31-4.2)      | 0.794     |
|                  | LDL-3    | 3.74(3.105-4.825)      | 4.325(3.405-5.1925)    | 4.51(3.43-5.97)     | 0.072     |
|                  | LDL-4    | 3.77(2.615-4.9)        | 4.3(3.32-5.5525)       | 4.88(3.58-5.8)      | 0.010 *   |
|                  | LDL-5    | 3.17(1.96-4.37)        | 4.44(3.345-5.8325)     | 4.8(3.92-6.12)      | <0.001 ** |
|                  | LDL-6    | 4.02(2.72-5.32)        | 5.375(4.13-6.8575)     | 6.1(4.44-7.2)       | <0.001 ** |
|                  | HDL-1    | 2.97(2.1-3.32)         | 3.02(2.425-3.6825)     | 2.74(2.31-3.59)     | 0.280     |
|                  | HDL-2    | 1.24(0.85-1.52)        | 1.205(0.88-1.5925)     | 1.11(0.74-1.49)     | 0.232     |
|                  | HDL-3    | 1.15(0.795-1.525)      | 1.105(0.765-1.505)     | 1.02(0.67-1.45)     | 0.607     |
|                  | HDL-4    | 2.61(2.075-3.115)      | 2.645(1.96-3.375)      | 2.78(2.21-3.33)     | 0.765     |
| Triglyceride     | Total TG | 118.27(91.665-149.355) | 101(72.375-136.19)     | 105.57(85.7-154.22) | 0.107     |
|                  | VLDL     | 8.47(5.4-12.21)        | 6.095(2.3125-11.8425)  | 7.26(3.54-13.9)     | 0.086     |
|                  | IDL      | 17.22(12.96-25.41)     | 17.89(14.5175-22.6525) | 19.7(15.97-24.06)   | 0.231     |
|                  | LDL      | 12.62(10.76-15.77)     | 11.35(8.6975-14.17)    | 11.31(9.44-14.19)   | 0.009 **  |
|                  | HDL      | 79.74(58.885-100.06)   | 68.245(48.155-96.35)   | 71.06(58.34-109.19) | 0.137     |
|                  | VLDL-1   | 32.18(21.26-50.19)     | 28.255(19.6125-46.325) | 33.5(20.58-51.36)   | 0.336     |
|                  | VLDL-2   | 14.27(8.865-20.545)    | 11.63(7.2975-18.15)    | 12.38(9.07-19.92)   | 0.123     |
|                  | VLDL-3   | 13.48(8.405-19.19)     | 10.9(7.29-15.645)      | 12.31(7.29-17.01)   | 0.204     |
|                  | VLDL-4   | 10.73(7.075-12.98)     | 8.465(6.68-11.1525)    | 8.16(6.35-11.26)    | 0.081     |
|                  | VLDL-5   | 2.95(2.505-3.665)      | 2.63(2.205-3.0925)     | 2.41(2-2.77)        | <0.001 ** |
|                  | LDL-1    | 5.63(4.17-7.94)        | 4.615(3.155-6.28)      | 5.05(3.61-6.67)     | 0.013 *   |
|                  | LDL-2    | 2.2(1.74-2.86)         | 1.95(1.5275-2.4925)    | 2.07(1.56-2.63)     | 0.113     |
|                  | LDL-3    | 1.47(0.95-2.025)       | 1.6(1.1975-2.135)      | 1.65(1.11-2)        | 0.455     |
|                  | LDL-4    | 2.25(1.28-3.1)         | 2.5(1.73-3.2025)       | 2.59(1.94-3.1)      | 0.108     |
|                  | LDL-5    | 2.2(1.38-3.295)        | 2.73(1.9875-3.775)     | 3.11(2.22-3.98)     | 0.009 **  |
|                  | LDL-6    | 2.74(2.18-4.25)        | 3.575(2.8975-4.6425)   | 4.04(3.1-4.82)      | 0.004 **  |
|                  | HDL-1    | 4.4(3.64-5.705)        | 3.87(2.83-5.2)         | 3.73(2.95-5.12)     | 0.006 **  |
|                  | HDL-2    | 2.34(1.97-3.03)        | 2.095(1.6375-2.66)     | 2.03(1.68-2.46)     | 0.007 **  |
|                  | HDL-3    | 2.46(2.03-3.085)       | 2.125(1.63-2.715)      | 2.15(1.76-2.63)     | 0.007 **  |

|              |        |                     |                         |                    |           |
|--------------|--------|---------------------|-------------------------|--------------------|-----------|
|              | HDL-4  | 3.63(3.205-4.28)    | 3.235(2.6975-3.9375)    | 3.41(2.96-3.94)    | 0.017 *   |
|              | VLDL   | 22.17(16.08-26.925) | 19.57(13.955-25.2475)   | 19.58(15.84-26.65) | 0.217     |
|              | IDL    | 5.38(3.39-7.92)     | 5.2(2.6825-7.19)        | 5.86(4.01-8.01)    | 0.236     |
|              | LDL    | 44.63(30.775-55.73) | 49.785(40.8225-61.495)  | 52.34(45.56-62.36) | 0.010 *   |
|              | HDL    | 60.57(52.18-68.3)   | 57.375(50.055-67.37)    | 53.69(47.35-63.44) | 0.034 *   |
|              | VLDL-1 | 5.87(3.595-9.365)   | 4.985(3.2075-8.33)      | 5.96(4.06-9.09)    | 0.225     |
|              | VLDL-2 | 3.53(2.33-5.315)    | 3(2.06-4.7575)          | 3.58(2.66-5.62)    | 0.144     |
|              | VLDL-3 | 4.45(3.265-6.655)   | 3.9(2.4875-5.6025)      | 4.27(2.72-5.77)    | 0.220     |
|              | VLDL-4 | 5.21(3.655-6.185)   | 4.31(3.1875-5.4025)     | 4.28(3.37-5.4)     | 0.091     |
|              | VLDL-5 | 2.26(1.885-2.655)   | 1.87(1.4575-2.29)       | 1.8(1.61-2.12)     | 0.002 **  |
| Phospholipid | LDL-1  | 10.78(8.095-14.285) | 9.13(7.4-11.44)         | 9.22(8.46-12.27)   | 0.020 *   |
|              | LDL-2  | 5.2(4.235-7.265)    | 5.58(4.0475-7.13)       | 5.95(4.38-7.66)    | 0.802     |
|              | LDL-3  | 5.06(3.865-7.335)   | 6.25(4.9725-8.2225)     | 6.76(5.12-9)       | 0.017 *   |
|              | LDL-4  | 6.04(3.71-8.555)    | 7.265(5.0975-10.0325)   | 8.37(5.85-10.23)   | 0.008 **  |
|              | LDL-5  | 6.05(4.02-8.88)     | 8.67(6.5375-11.65)      | 9.47(7.72-12.77)   | <0.001 ** |
|              | LDL-6  | 8.75(6.835-12.305)  | 11.56(9.305-14.7775)    | 13.53(10.16-15.97) | <0.001 ** |
|              | HDL-1  | 15.7(12.19-20.37)   | 14.595(11.6375-18.6375) | 13.93(11.14-17.31) | 0.084     |
|              | HDL-2  | 10.49(8.535-13.875) | 9.685(7.9975-12.3775)   | 8.44(7.06-10.83)   | 0.002 **  |
|              | HDL-3  | 11.53(9.95-13.93)   | 10.875(8.9075-12.8275)  | 9.92(8.15-12.11)   | 0.028 *   |
|              | HDL-4  | 19.65(18.05-21.65)  | 19.715(17.205-22.7575)  | 20.32(17.15-23.02) | 0.903     |

\* $P < 0.05$ ;\*\* $P < 0.01$
